# Supplementary material for: Genome-wide profile analysis of the Hsp20 family in lettuce and identification of its response to drought stress
Source: Front Plant Sci. 2024 Jul 12;15:1426719. doi: 10.3389/fpls.2024.1426719 (PMC11272627; doi:10.3389/fpls.2024.1426719)
Supplement: Supplementary file 1 [file Table_1.xls]

## Sheet: Sheet1
Supplementary Table S1. Protein sequences of LsHsp20 gene family
>LsHsp20-1
MSIIPSFFGGRRSSIFDPFSLDIWDPFKDFPISSSSDHVSRETSA
LVNTRVDWKETPEAHVFKADLPGIKKEEIKVEVEDDRILQISGE
RNVEKEDKKDTWHRVERSSGKFTRRFRLPENAKMDQVKAAM
ENGVLTITIPKEEVKKPDVKSIEISG
>LsHsp20-2
MRTIALSALMLYLFFAGQCGGSLLSLLDHHPDPIGSSLLSDLIRS
DLFSNPFRELEQIPFGIEQDDEVIVLPARVDWKETRNSHVITMD
VPGMKKEELKIEVEENRVLRVSGERRREKEKEEVEKDGGGDHW
HRCERSYGKFWRQFRLPENLDLDKVNARLEDGVLTISIGKLTPD
QIKRPKVVSIGAGEPSALLSDSETKSEL
>LsHsp20-3
MAMFRFITQSHRSSLKTHQWTSQLLQHFTITTTTDHPEKPDTK
EISISDSTRKPKLFSPKRRSRRSPWSRNNDRNFLPSLSGVGHA
VVEAAANMNKLLENLSLSHLIRRFKEKDESYSIKYQMPGLSKD
DVKITVEDGMLFIRGEHKEEEEEGDEEEYWTAARYGYYNTSLM
LPEDAKVEEIKAEMKDGVLHVVIPKDDTKKKNVKEVKVG
>LsHsp20-4
MAQCQTTLPLFCQRITTHRSNPSSSIFIPITHKKNPNFTIIKADAR
NGDQLQRTSIKNQQPIKKRVAQSPPVGLWDRFPTARTVQQM
MDTMDRLMEEPLAYNGGGNGGAWGSQGQGTSSYSRGRTP
WEIKEGEEDYKLRFDMPGMTKEDVKVWVEEKMLVLKAEKVKK
DNNGESNEEAIDEGEWSPKSFGRYSFRIALPENIQFEKIKAEVRD
GVLYVTIPKAPVSSKVLDISVQ
>LsHsp20-5
MSIIPSFFGSRRSSVFDPFSLDIWDPFDGLLTSSLSDVRATVRET
TPRVDWKETPAAHIFTADLPGLKKEEVKVEVEEGRILKISGERSS
EKEEKTDKWHRVERSSGKFQRSFRLPENAKVDEMKASMENG
VLTVTVPKQEVKKPEVKAIDISG
>LsHsp20-6
MAYLPGRTTPFGDNKSSSSLTFEEFVPPSAWTEDSTYHYLLVD
LPGFKRQELKLQADNKTHIVVSGERQERENKYKRFEQRFELPT
NADVDKITGKLDGEILYISVPKKIEPQHQEIKHGGEIEPEPEPVS
ASASASVLESEPEPVSSDEEDDDEKKSDANENESDKKDGEKG
IIERKEDKRVFNEDWEKEAHLYLRIAIEKIRKNKGIVVTAIFAFSL
GVMVSQKFQSNGQTVIV
>LsHsp20-7
MALNFDKKLMKVADEFADFDLLKTKDQPGPRFQTQETESMF
ILSVQLQGYKRTHIKVEINKDGNITIHGEKPFQDTLMVGGKVI
KKDIQMHGFRKPFKIPQGVVLDKVKARFNEENSELVIRIPKAT
KGFIGIGIEELKTKEIPSESTELLHIYSNGELSEQEIEEKNVQDFT
ENIKEEQVETNDGESKEHDNQEPKLPQRKFKISTPVVFGSTFF
VSLIVLVFHLVQSKKPVKQQKKTDED
>LsHsp20-8
MDISTLMGFDSPLLHNLHHILTATDDTTTNNKSSNAGPTGA
YVRDARAMAATPADVKEYPNSYVFIVDMPGLKSGDIKVQV
EEDNVLVISGERKREHDQEEKEGVKYVRMERRIGKFMRKFV
LPENANMEKISAICQDGVLTVTVEKLPPPEPKKPKTIQVQVA
>LsHsp20-9
MDISLMGFDTPFFRHLHHILDANEDNNTNSKSSNAGPTRA
YVRDARAMAATPADVKEYPNSYVFIVDMPGLKSGDIKVQV
EEDNVLVISGERKREHDQEEKEGVKYVRMERRIGKFMRKFS
LPENANTDKISAICQDGVLTVTVEKLPPPEPKKPKTIQVNVA
>LsHsp20-10
MAASLAVKRGTIGVATVLNKLLNPLRSVSAVPSVQRCFNTN
SSQMTAYDDDNRGVDVDRRADTTVSRRRDNDLFSDVFDP
FSPPRSLSQIFNMMDQFMGNPLMSSSRGGGFSTRRGWDA
KEDNDSLNFRFDMPGIDKDNVKISVEQNTLVIRAEAEKETED
EEEPPRRYSSRIDLPLNAYKVDEIKAELKNGVLKIRVPKVKEEE
RKDVRQIQVE
>LsHsp20-11
MSRVAISSPGDLDFGGLVSHLLDVPDGIGKIIFPSSRSHHGN
GESEGNIAVDILETPKELVMYMDVPGLSKSDIQVTVEEEKLLV
VRSNGKRKREENEEEGGCKYLRLERRPPRKLMRKFRLPENCN
MSAITAKCENGVLTVTVEKIPPPPKSRTVEVAIA
>LsHsp20-12
MDISLMGFDTPFFRNLHHILEATDDTTTNNKSSNAGPTGAYV
RDARAMAATPADVKEYPNSYVFIVDMPGLKSEDIKVQVEEDN
VLVISGERKREHDQEEKERVKYVRMERRIGKFMRKFALPENAN
LEKISAICQDGVLTVTVEKLPPPEPKKPKTIQVQVA
>LsHsp20-13
MASMKLEVVSEDQSLRKWCVPLREDIFATFMAKGSPIMHKVF
GDKSLFGPLLFTKFFDPSDAFPLWEFEPGVLLSNLQNPCVDWLQ
TDSCYVLKSELPKIEKSSVRICVENGKVMEISGVWKNKGESSRTD
WRSGEWWEHGFVRRLELPENTDWKKTEAYVYNDTVLDIRLPKT
PSMEYCTEGVIKESSSG
>LsHsp20-14
MPMSKMHKITLFALTALIALITISLPTKTEALIPYNRPLWDMMIPT
EDPFKVLEHNPLQLPKNLETINLARADWKETSGHHEISLDVPGLK
REDIKIEVEESRVLKVSGERKAEEEVDGDKWHRAERTSGKFWRQ
FRLPGNVDMEKIMAHLEDGVLKIKVPKLAHEKKQSRVIDIMGQE
SSGGDIKATKTAA
>LsHsp20-15
MDIDLRGFGMDPATIAAIATMFDVADEVDSDKPHPPSRAYVRD
AKAMRNTPADIIEYPNSYQFIVDMPGLKREQIKVHVEDSNVLVV
SGERRREKEEGVKYVRMERRVGKLLKKFILPENANMDAISAVNH
DGVLKVMVEKLPPPEPKKPKTIEVKVGSPSEEAAPASDGTGTSGQ
LYK
>LsHsp20-16
MEFSTFPPSWHSFFTSPLLFPYQFIPGNYVHWTETPESHIYSADIPG
VKKEEICVEVEDSRYLIIRTESADDTVMTPGGRTFMKKFRLPDTIDV
NGISACYENGVLTVTVPRSFVRRGFYIEPADLPQHTEVLARAA
>LsHsp20-17
MGFDTPFFRNLHHILDATEDTNTNSKSSNAGPTRAYLRDARAMAA
TPADVKEYPSSYVFIVDMPGLKSGDIKVQVEEDNVLVISGERKREHD
QEEKEGAKYVRMERRIGKFMRKFALPENANTDKISAICQDGVLTVT
VEKLPPPEPKKPKTIQVNVA
>LsHsp20-18
MIPSIETDDALHLWLHMLNMNQNHHHHPEIGVFSNRISSMSGGC
LAGGVGWVYANSIPVWRLLDTLFLLAVSRKTQILLFLLEDSRDPFPIA
YINPTFLIQHRTRQSNKGCSISNILQFTICYSIQSTKPTSRKLKPQKMP
MSKMHTTTLFALTALMALITISLPTQTEALIPYNRPLWDMMIPAEDP
FKILEHNPLHLPKNLETINLARADWKETSGHHEISLDVPGLKREDIKIE
VEESRVLKVSGERKAEEEVDGDKWHRAERTSGKFWRQFRLPGNVD
MEKIMAHLEDGVLKIKVPKLAHEKKQSRVIDIMGQESSGGDIKATKT
AA
>LsHsp20-19
MSIIPSFFTGRRSNVFDPFSLDIWDPFQGFSSVLNNLPESSRETAAIT
NARIDWKETPEAHVFKADIPGLKKEEVKVEVEEGRVLQISGERSKEH
EEKNDRWHRVERSSGKFLRRFRLPENTKMEEVKATMENGVLTVTV
PKAEEKKPEVKSIDIGGKRNCSMFSLFPTRGSHESDCDFQEVSDSN
NGGDGEGGWRWLRLTWWHEL
>LsHsp20-20
MSIIPSFFTGRRSNVFDPFSLDIWDPFQGFSSVLNNLPESSRETAAIT
NARIDWKETPEAHVFKADIPGLKKEEVKVEVEEGRVLQISGERSKEH
EEKNDRWHRVERSSGKFLRRFRLPENTKMEEVKATMENGVLTVTV
PKAEEKKPEVKSIDIGG
>LsHsp20-21
MSIIPSFFGGRRTNVFDPFSLDIWDPFEGFPFNNNNNFRSLSDRVG
SSETASFAHANIDWRETADAHVFKADVPGLKKEEVKVQVEDDRVL
QISGERNKESEEKGDTWHRVERSSGKFMRRFRLPENAKVDQVKAA
MENGVLTVTVPKVEVKKPDVKSIQISG
>LsHsp20-22
MSIIPSFFTGRRSNVFDPFSLDIWDPFQGLSSALSNLPESSRETAAIA
NTRIDWKETPEAHIFKADLPGLKKEEVKVEVEEGRVLQISGERSREHE
EKNDKWHRVERSSGKFLRRFRLPESAKLEEVKASMENGVLTVTVPK
AEEKKPEVKSIDISG
>LsHsp20-23
MKLGGGGTNNLNRPRRVITGRVYEKFKPIFEWKQEDDHDNLLVYLL
GFRKEFIKVTIENPNILRIRGECLVSGNKWNRFQEYFTVPETCEKSKIC
AKFDGGILSITMPKKMTDAPTITFPHQPSFVTSDNTNPNNQGKIEHK
QSNQIKENEPSIEKIIKTKTSMDSKDKLERCKMIVKMLAIGGMNDGR
MVVVNMVAMVLLVALSWGLCSVLHWNLR
>LsHsp20-24
MEAKGITTPAARVYQDFEPSMEWVPEDDSDTLLVYLPGFAKEQLRV
QLRSRNLIISGERKLQQDTWSRFRVEFPVSANCDLNKISAKFEGNILF
VRQPKLITPEPKPVEETPPVVAAAPLPTPQKPVAVPNVGQKITDEKPT
PATQTNTENSLRKDQEVPKMGVEESSKKPDEKSSEPKKAKGVRENA
SEKKPSDSDRKKKTKVALGELDKTTKTAIENYKRAVGVFATKLKTSRN
AVNTIVILLVGLVIGVYVSGSIKSWTKP
>LsHsp20-25
MSIIPSFFTGRRSSVFDPFSLDIWDPFQGFSSVLNNLPESSRETAAITN
ARIDWKETPEAHVFKADLPGLKKEEVKVEVEEGRVLQISGERSKELEE
KNDRWHRVERSSGKFLRRFRLPENAKMEEVKASMENGVLTVTVPK
AEEKKPEVKSIDIGGSMLSTSNDENCLVGESQPIDDTNDIMDDFTVE
DAFATIEDMILEKLQKKKTKA
>LsHsp20-26
MDSKGRTTPTHVYQQLEPSIEWVNEDDCNTLLVYLPGFTKEQLRVQ
LRSKTLIISGERKLHDNAWIRFRKEFIASEQCVISKISAKFEGSILFVKQP
KSVAPMAEEEGKPPIEAPAPKPEKPIDETKKHQKRTRVEHDTKPTSTT
ESNDRNGVGQNAKKDSEKNVELKEQKGVCENASEKKVSDLGFVM
KMKPSKNVVNLILVLVVGLLVGVYCSEAIKSCNA
>LsHsp20-27
MAAPNGSHATWTNQVPIAVAPLNCVPYTGPPLDNSDVDMAQKES
NQVSKNQPAMVFLPPQTTEKELNDILETTTHGVVVSGGAASGKFGP
LIGSVDISESHDTFLFRVALPGVKNDQKFKCDIQEDGSITIEGATETGE
KKVHVHNMVFEMHTQNLCPPGNFSVSFQLGGPVDPLTLEKELANG
VLEGVVKKKPLKGL
>LsHsp20-28
MALLGDPFRRFFFNPPIYRTGSVTTGLMDWFETPQAHFIKINVPGYSK
EDVKVQVEEGNVLVVRGEGGKEKEKEKGTVWHVAERGGGVEGVGF
SREIELPEDVKVDQIKAQVENGVLTVVLPKDLSPKASKVRNIHVSSKL
>LsHsp20-29
MDSKVGGTQLQKLLSYDEFEPMCTWQREDGQDVLVLHLPEFKKDQL
RIQISNTGILKITGENVVDGKRRNRFLKEIKVTKDYDSNNIHAKFSQGR
LRVTMPKKVPTPTTMESPSAAAMALPQDNQNDTIANTNGKTSIIPNI
RARVGKVVKSKEFSAAMVNVGFVVVAAFSIYVAYNYWTSYVRVDED
>LsHsp20-30
MDISLMGFDSPLLHNLHHILAATDDTTTNNKSSNIGPTRAYVRDARA
MAATPADVKEYPNSYVFVVDMPGLKSGDIKVQVEEDNVLVISGERK
REHDQEEKEGVKYVRMERRIGKFMRKFALPENANLEKISAICQDGVL
TVTVEKLPPPEPKKPKTIQVQVA
>LsHsp20-31
MATTLILKRSTAASSHYTKIFKSIRSVSAIPCVQRSFNTNASQVSAYED
FHRSIDEDRSSGSSGFRRRDNDFFSGEFHVSIFPARSFSEIFNMMDQ
FMDTPFISASRGGGLGGRRGWYAKEDDNTMNLRFDMPGLDKENV
KVSVEQNTLIIKAEEEKDSEDDEEARRRYSSRIDLPTDVYILDEIKAEM
KNGVLKVVLPKVKTEERKDVFQVQVE
>LsHsp20-32
MACTTSGISSSPLLSNNISKPSTKSIRPTCCALRFFPPSRTRSRLPVVR
AQAEKDTSVDVQVSSNQGKASANGSVERRPSSTTISPFGLLDPLSP
MRTMRQMLDTMDRIFEDSMAFPTRTGTAWNIRSPWDIQDSENEI
KMRFDVPGLSKEDLKVYVEDDMLVIKGEHTQDDQNEGGDKSSWT
RQNYSSYQTRIDLPDNCEKEKIKADLKNGVLLISIPKKTVERKVIDVEIQ
>LsHsp20-33
MSIVPSFFGGRRSSIFDPFSLDIWDPFKDFPFPTPSDASTETSALVNA
RVDWKETPEAHVFKADLPGIKKEEVKVEVEGDRILQISGERNVEKED
KNDTWHRVERSSGKFTRRFRLPENSKMDQVKASMENGVLTITIPK
EEVKKPDVKPIQISG
>LsHsp20-34
MSIIPSFFGGRRSSVFDPFSLDIWDPFKDFPFPTSSDASRETSALVNA
RVDWKETPEAHVFKADLPGIKKEEVKVEVEDDRILQISGERSVEKED
KNDTWHRVERSSGKFTRRFRLPENSKMDQVKASMENGVLTITIPK
EEVKKPDVKPIQISG
>LsHsp20-35
MQFSTFQPSLQSFFTSPLLFPYPFIPENYVRWDRWDETPESHIYSA
DIPGVRKEDIRVEIEDSKYLIIRTESADDMMIMAGRRSFLKKFRLPE
TIDVNGISAGYENGVLTITVPRSFVRREFYIEPGDLHEQVEVLARAA
>LsHsp20-36
MDSSSKLGLHPKDETDPVFITQQTDSMFILKSHLKGYDRSNIKIEI
NEDGSRITISGKNPVCQEETIKGFQKTFRIPEGVVLDKVKARFDQD
ESRLIIRMPKSVHGIVGIGIQELENPIQENENHEMKNEETVGSNDL
TQEEEVKPREKSSIICTPVIAGSTLFVTIIVVVLSLFRSKTGSREKKN
>Actin
MADTEDIQPLVCDNGTGMVKAGFAGDDAPRAVFPSIVGRPRHTGVMVGMGQKDAYVGDEA
QSKRGILTLKYPIEHGIVSNWDDMEKIWHHTFYNELRVAPEEHPVLLTEAPLNPKANREK
MTQIMFETFNVPAMYVAIQAVLSLYASGRTTGIVLDSGDGVSHTVPIYEGYALPHAILRL
DLAGRDLTDSLMKILTERGYMFTTTAEREIVRDMKEKLAYVALDFEQELETAKSSSSVEK
NYELPDGQVITIGAERFRCPEVLFQPSLIGMEAAGIHETTYNSIMKCDVDIRKDLYGNIV
LSGGSTMFPGIADRMSKEITALAPSSMKIKVVAPPERKYSVWIGGSILASLSTFQQMWIS
KGEYDESGPSIVHRKCF
