# Supplementary material for: Genome-wide profile analysis of the Hsp20 family in lettuce and identification of its response to drought stress
Source: Front Plant Sci. 2024 Jul 12;15:1426719. doi: 10.3389/fpls.2024.1426719 (PMC11272627; doi:10.3389/fpls.2024.1426719)
Supplement: Supplementary file 2 [file Table_2.xls]

## Sheet: Sheet1
Supplementary Table S2. Cds sequences of LsHsp20 gene family
>LsHsp20-1
ATGTCGATCATTCCAAGTTTCTTCGGTGGCCGACGAAGCAGCATCTTCGATCCATTCTCA
CTCGACATCTGGGACCCTTTCAAAGATTTCCCGATTTCATCTTCGTCTGATCATGTCTCG
AGAGAAACCTCCGCGTTGGTAAACACCCGTGTGGATTGGAAGGAAACCCCAGAAGCCCAT
GTGTTTAAAGCCGATCTTCCTGGGATCAAGAAAGAAGAAATCAAGGTGGAGGTGGAGGAC
GACAGGATACTTCAAATCAGTGGTGAGAGAAATGTCGAGAAAGAAGATAAAAAGGATACT
TGGCATCGTGTGGAACGCAGCAGTGGGAAGTTCACCAGAAGGTTCAGGTTGCCGGAGAAT
GCTAAGATGGATCAGGTGAAAGCAGCCATGGAAAACGGAGTGCTCACAATTACTATCCCC
AAAGAAGAAGTGAAGAAGCCCGATGTGAAGTCCATTGAGATATCTGGTTAA
>LsHsp20-2
ATGAGGACAATCGCACTATCAGCATTAATGTTGTATCTGTTCTTCGCCGGACAATGTGGC
GGATCTCTGTTATCGTTACTCGATCACCATCCCGATCCAATCGGAAGCAGTTTGTTGTCC
GATCTCATCAGATCCGATCTGTTTTCGAACCCTTTTAGAGAACTGGAGCAGATTCCGTTT
GGAATCGAGCAAGACGATGAAGTGATTGTGTTGCCGGCGAGAGTGGATTGGAAGGAGACA
AGAAACAGTCATGTGATCACGATGGATGTTCCTGGGATGAAGAAGGAAGAGTTGAAGATT
GAGGTGGAGGAGAATCGGGTTTTGAGAGTTAGTGGAGAGCGGAGGAGGGAGAAGGAGAAG
GAGGAGGTGGAGAAAGACGGTGGTGGTGATCACTGGCACCGCTGTGAACGGTCGTATGGA
AAGTTCTGGAGGCAGTTTAGGTTACCTGAAAATCTCGATCTAGACAAGGTGAATGCGAGG
CTTGAGGATGGAGTGTTGACGATTTCCATCGGGAAATTGACACCGGACCAGATAAAAAGG
CCGAAGGTGGTGAGCATTGGTGCCGGAGAACCATCTGCGCTGCTGTCTGATTCGGAGACG
AAATCGGAACTTTGA
>LsHsp20-3
ATGGCCATGTTCCGTTTTATCACTCAGAGTCACCGATCATCTCTCAAAACCCACCAATGG
ACCTCTCAACTCCTCCAGCATTTCACCATCACAACCACCACCGACCACCCTGAAAAACCA
GACACAAAAGAGATTTCCATCTCCGATTCTACCAGAAAACCCAAACTCTTTTCACCAAAG
AGACGCAGCCGGAGATCACCTTGGTCGAGAAACAATGATCGGAACTTCCTTCCTTCTCTC
TCCGGTGTTGGGCATGCCGTCGTGGAAGCGGCGGCGAACATGAACAAACTACTGGAAAAC
TTGTCTCTGTCCCATCTGATAAGGAGATTCAAAGAGAAAGATGAGAGTTACAGCATCAAG
TATCAGATGCCTGGGCTCTCGAAAGATGATGTGAAGATTACAGTTGAAGATGGGATGTTG
TTCATCCGAGGAGAGCATAAGGAGGAGGAGGAGGAAGGAGACGAGGAGGAGTATTGGACG
GCAGCCAGATACGGGTACTATAACACTAGCCTGATGCTGCCGGAGGATGCTAAAGTGGAG
GAGATCAAGGCGGAGATGAAAGATGGGGTGCTTCATGTAGTCATACCAAAAGATGACACC
AAGAAGAAGAATGTCAAGGAGGTTAAAGTTGGCTAG
>LsHsp20-4
ATGGCTCAATGTCAGACTACACTCCCATTGTTCTGTCAAAGAATCACAACCCACAGATCA
AACCCTTCATCTTCAATTTTCATCCCAATTACTCACAAAAAGAATCCTAATTTCACCATC
ATAAAAGCAGACGCAAGAAACGGGGATCAGTTACAGAGAACAAGCATCAAGAATCAGCAA
CCCATCAAGAAGAGAGTCGCCCAATCCCCACCTGTTGGGTTATGGGATAGATTTCCAACA
GCAAGAACAGTTCAGCAAATGATGGACACAATGGACAGACTAATGGAGGAGCCACTGGCA
TACAACGGTGGTGGAAATGGTGGTGCGTGGGGATCTCAGGGACAGGGTACAAGCAGTTAC
AGCAGGGGAAGGACTCCATGGGAGATCAAAGAAGGTGAAGAGGACTACAAGTTGAGATTT
GATATGCCTGGAATGACGAAAGAAGATGTGAAGGTGTGGGTGGAAGAGAAGATGCTGGTT
TTGAAAGCAGAAAAAGTGAAGAAAGACAACAATGGTGAAAGCAATGAGGAAGCCATTGAT
GAGGGGGAATGGAGCCCTAAAAGCTTTGGGAGGTATAGTTTTAGGATTGCATTGCCTGAA
AATATACAGTTTGAGAAGATTAAGGCTGAGGTTAGAGATGGGGTTTTGTATGTAACGATA
CCTAAAGCACCTGTTTCTTCCAAGGTGTTGGATATAAGCGTTCAATGA
>LsHsp20-5
ATGTCGATAATTCCAAGCTTCTTTGGTAGCCGGCGATCCAGTGTCTTTGATCCCTTTTCT
TTAGACATTTGGGATCCCTTTGACGGTTTATTGACCTCCTCCCTATCTGATGTTCGGGCA
ACTGTCCGTGAAACCACCCCCAGAGTTGACTGGAAGGAGACCCCAGCAGCTCACATTTTC
ACGGCGGATCTTCCAGGGTTGAAGAAGGAGGAGGTGAAGGTTGAGGTGGAAGAAGGTAGG
ATTTTAAAGATCAGTGGAGAGAGGAGCAGCGAGAAAGAGGAGAAGACCGACAAGTGGCAC
CGTGTGGAGAGGAGCTCCGGCAAGTTTCAGAGGAGTTTCAGATTGCCGGAGAATGCAAAG
GTTGATGAGATGAAGGCTTCAATGGAGAACGGAGTGTTGACTGTGACTGTGCCAAAGCAG
GAGGTGAAGAAGCCTGAGGTGAAAGCCATTGATATCTCGGGTTGA
>LsHsp20-6
ATGGCATATCTCCCAGGAAGAACAACACCTTTTGGTGACAATAAAAGCTCAAGTAGTTTA
ACATTCGAAGAATTTGTCCCTCCTTCCGCATGGACTGAAGACTCAACATACCATTACCTC
CTTGTCGATCTTCCCGGTTTCAAGAGGCAGGAGTTAAAGCTTCAAGCCGATAACAAGACT
CATATAGTGGTTAGTGGAGAAAGGCAAGAAAGAGAGAACAAATACAAACGATTCGAGCAA
CGTTTTGAGTTGCCAACGAATGCTGACGTGGACAAGATCACGGGGAAGCTCGATGGCGAG
ATTTTATATATTAGTGTTCCGAAAAAAATAGAACCGCAACATCAAGAAATTAAACATGGC
GGTGAGATCGAACCAGAACCAGAACCAGTATCAGCATCAGCATCAGCATCAGTATTGGAA
TCAGAACCTGAACCGGTGTCATCAGACGAAGAGGATGATGATGAAAAGAAATCAGATGCA
AATGAAAATGAAAGTGATAAGAAAGATGGTGAAAAGGGTATTATTGAAAGAAAGGAAGAT
AAAAGGGTTTTTAATGAAGATTGGGAAAAAGAGGCTCATTTATATTTGAGAATTGCGATT
GAAAAAATAAGAAAGAATAAAGGGATTGTTGTGACAGCAATCTTTGCGTTCTCGTTAGGG
GTGATGGTGAGTCAGAAGTTTCAGTCAAATGGACAGACAGTAATTGTATGA
>LsHsp20-7
ATGGCACTTAATTTCGACAAAAAACTCATGAAAGTTGCTGATGAATTTGCCGATTTCGAC
CTTTTAAAGACAAAGGACCAACCTGGTCCTCGTTTTCAAACTCAAGAGACAGAATCCATG
TTCATCCTCAGTGTCCAACTCCAAGGTTATAAACGAACACATATAAAAGTTGAGATAAAC
AAAGATGGGAATATCACAATACATGGCGAAAAACCATTTCAAGATACATTGATGGTTGGA
GGAAAAGTCATAAAGAAAGATATCCAAATGCATGGATTCCGAAAACCATTCAAAATCCCA
CAAGGGGTTGTTTTGGATAAAGTCAAAGCTAGGTTCAATGAAGAAAACTCAGAACTTGTA
ATTCGAATCCCAAAAGCTACAAAAGGATTCATCGGGATTGGAATTGAGGAGTTGAAAACG
AAAGAAATCCCATCAGAATCCACAGAACTATTACATATTTATTCTAATGGAGAGTTGTCA
GAGCAAGAAATTGAAGAGAAAAATGTTCAAGATTTCACAGAAAATATAAAAGAAGAACAA
GTTGAAACTAATGATGGTGAAAGCAAAGAGCATGATAACCAAGAGCCAAAATTGCCACAA
AGGAAGTTCAAGATAAGCACTCCAGTCGTGTTTGGATCCACTTTCTTTGTGTCTCTCATC
GTGTTGGTTTTCCACTTGGTCCAATCTAAAAAACCAGTAAAACAACAAAAGAAAACAGAT
GAAGATTAG
>LsHsp20-8
ATGGACATCAGTACTCTAATGGGTTTCGATTCGCCGCTTTTGCACAACCTCCACCACATC
CTTACAGCCACCGACGACACCACCACCAACAACAAATCAAGCAATGCCGGACCTACTGGC
GCTTACGTCCGTGACGCTAGAGCAATGGCTGCAACTCCGGCTGATGTGAAGGAGTATCCC
AACTCTTACGTCTTCATCGTCGACATGCCTGGTCTGAAGTCCGGAGATATCAAGGTCCAG
GTGGAGGAAGACAACGTGTTGGTGATAAGTGGAGAGAGAAAAAGGGAACACGATCAGGAA
GAGAAGGAAGGAGTTAAGTACGTGAGAATGGAAAGGAGGATCGGGAAGTTTATGAGGAAG
TTTGTGTTGCCGGAGAATGCTAATATGGAGAAGATATCGGCGATTTGTCAAGATGGAGTG
CTTACAGTGACGGTGGAGAAACTGCCACCTCCGGAGCCAAAGAAGCCGAAGACGATTCAG
GTCCAGGTTGCTTGA
>LsHsp20-9
ATGGATATCAGTCTGATGGGTTTCGACACGCCGTTTTTTCGCCACCTCCATCACATCCTC
GACGCCAACGAAGACAACAACACCAACAGCAAATCAAGCAATGCCGGACCTACTCGCGCT
TACGTACGTGACGCCAGAGCAATGGCTGCAACTCCGGCCGATGTGAAGGAGTATCCCAAC
TCTTACGTCTTCATCGTCGACATGCCGGGTTTGAAGTCCGGAGATATCAAGGTCCAGGTG
GAGGAAGACAACGTGCTTGTGATAAGTGGAGAGAGGAAAAGGGAACATGATCAGGAAGAA
AAGGAAGGAGTGAAGTACGTGAGAATGGAGAGGAGGATCGGTAAGTTTATGCGGAAGTTT
TCGTTGCCGGAAAATGCTAATACGGATAAGATATCTGCGATTTGTCAAGATGGGGTACTT
ACCGTCACGGTGGAGAAACTACCGCCGCCGGAGCCGAAAAAGCCGAAGACGATCCAGGTT
AACGTTGCTTGA
>LsHsp20-10
ATGGCAGCTTCACTCGCTGTTAAGAGGGGCACCATTGGCGTTGCAACCGTGCTTAACAAG
CTATTAAATCCACTCCGATCTGTTTCTGCTGTTCCTTCCGTCCAACGGTGCTTCAACACT
AATTCGTCCCAGATGACTGCCTATGACGATGACAATCGCGGTGTCGATGTCGATCGCCGC
GCCGATACAACTGTCTCTCGCCGCCGTGATAATGATCTATTTTCTGACGTATTCGATCCG
TTTTCTCCACCGAGAAGCCTAAGCCAGATCTTCAACATGATGGATCAGTTCATGGGGAAT
CCGCTTATGTCGAGCTCTCGAGGAGGAGGATTCAGTACGAGACGGGGATGGGACGCAAAG
GAAGACAACGATTCTCTCAACTTTCGGTTCGACATGCCAGGTATAGACAAAGACAACGTT
AAGATCTCTGTGGAGCAGAACACTCTGGTGATTCGTGCAGAGGCGGAGAAGGAAACGGAG
GATGAGGAGGAGCCGCCGCGGAGGTACTCTAGCAGGATTGATCTGCCGCTAAACGCATAC
AAGGTTGATGAAATAAAGGCGGAGCTGAAGAACGGTGTACTGAAAATTAGGGTTCCGAAA
GTGAAGGAAGAGGAGAGGAAAGATGTGAGGCAGATTCAGGTGGAGTGA
>LsHsp20-11
ATGAGCAGGGTTGCGATTTCTTCTCCAGGAGATCTGGATTTTGGTGGTTTAGTGAGCCAT
CTACTGGACGTCCCTGACGGAATTGGGAAGATAATCTTCCCTTCTTCTCGTTCTCATCAC
GGAAATGGCGAATCGGAAGGCAACATTGCGGTGGATATACTGGAGACACCCAAGGAACTG
GTTATGTACATGGATGTCCCTGGTTTATCCAAATCCGACATCCAGGTGACGGTGGAGGAG
GAGAAATTACTGGTAGTGAGAAGCAATGGGAAGAGGAAGCGTGAGGAGAATGAGGAGGAA
GGAGGGTGCAAGTACCTGAGACTGGAAAGGAGACCTCCTCGGAAGCTGATGAGGAAATTC
CGGCTACCTGAGAACTGTAACATGTCGGCCATCACCGCCAAGTGCGAAAACGGGGTGTTG
ACAGTGACGGTGGAGAAGATCCCTCCGCCACCCAAATCCAGGACTGTTGAAGTAGCAATT
GCTTGA
>LsHsp20-12
ATGGATATCAGTCTGATGGGTTTCGACACGCCGTTCTTCCGCAACCTCCACCACATTCTT
GAAGCCACCGACGACACCACCACCAACAACAAATCAAGCAATGCCGGACCTACTGGCGCT
TATGTCCGTGACGCCAGAGCAATGGCTGCAACTCCGGCTGATGTGAAGGAGTATCCCAAC
TCTTACGTCTTCATCGTCGACATGCCTGGTCTGAAGTCCGAAGATATCAAGGTCCAGGTG
GAGGAAGACAACGTGTTGGTGATAAGTGGAGAGAGAAAAAGGGAACACGATCAGGAAGAG
AAGGAACGAGTTAAGTACGTGAGAATGGAGAGGAGGATTGGTAAGTTTATGAGGAAGTTT
GCGTTGCCGGAAAATGCCAATTTGGAGAAGATATCGGCGATTTGTCAAGATGGAGTGCTT
ACAGTGACGGTGGAGAAACTGCCACCTCCGGAGCCCAAGAAGCCGAAGACGATTCAGGTA
CAGGTTGCTTGA
>LsHsp20-13
ATGGCTAGCATGAAGCTTGAGGTTGTATCAGAAGACCAATCTCTACGTAAATGGTGTGTT
CCTTTGAGAGAAGACATATTTGCTACATTTATGGCAAAAGGAAGTCCAATCATGCATAAG
GTTTTTGGTGATAAATCATTGTTTGGACCATTATTGTTTACAAAATTCTTTGATCCATCG
GATGCGTTTCCACTATGGGAATTTGAACCAGGTGTGTTGTTGTCTAATCTTCAGAACCCA
TGTGTGGATTGGCTTCAAACAGACTCATGTTATGTTCTTAAATCCGAACTACCAAAAATA
GAAAAAAGCAGTGTTCGAATTTGTGTTGAGAATGGAAAGGTGATGGAGATTAGTGGGGTG
TGGAAGAACAAAGGAGAATCATCAAGAACAGACTGGAGGAGTGGCGAATGGTGGGAGCAT
GGCTTTGTGCGGCGGTTGGAGTTGCCGGAAAATACAGACTGGAAGAAGACGGAGGCGTAT
GTGTATAATGATACAGTTTTGGACATTAGACTTCCGAAGACGCCATCAATGGAGTACTGT
ACTGAGGGTGTGATCAAAGAATCTTCATCTGGGTAG
>LsHsp20-14
ATGCCGATGTCCAAAATGCATAAGATCACCTTATTTGCTTTGACAGCATTAATCGCATTG
ATTACGATAAGCTTACCTACAAAAACAGAGGCTCTAATCCCCTACAACAGACCTCTTTGG
GACATGATGATCCCAACCGAAGACCCATTCAAGGTTCTGGAACATAACCCACTTCAGCTT
CCGAAAAACCTTGAAACGATCAACTTGGCACGAGCCGACTGGAAGGAGACATCCGGACAT
CACGAGATATCCTTGGATGTACCAGGGTTGAAGAGGGAGGACATAAAGATCGAGGTGGAA
GAGAGCAGAGTCTTGAAGGTGAGCGGAGAGAGGAAGGCTGAGGAGGAAGTCGACGGTGAT
AAGTGGCATAGGGCGGAAAGGACGAGTGGTAAGTTCTGGAGGCAGTTCCGGTTGCCGGGG
AATGTGGACATGGAGAAGATAATGGCACATCTTGAAGACGGCGTGTTGAAGATCAAGGTG
CCGAAGTTGGCTCACGAGAAGAAACAATCTAGGGTTATTGATATCATGGGCCAAGAGAGC
TCTGGTGGGGACATTAAGGCAACGAAGACTGCTGCGTGA
>LsHsp20-15
ATGGATATCGATTTGAGGGGATTTGGTATGGATCCGGCGACAATCGCGGCTATCGCAACC
ATGTTTGACGTCGCCGACGAAGTTGACTCCGATAAACCCCATCCGCCGTCGCGAGCATAC
GTTCGGGACGCTAAGGCAATGAGAAACACGCCGGCAGATATCATAGAGTACCCGAACTCG
TACCAGTTCATCGTGGACATGCCTGGGCTGAAGCGGGAGCAGATCAAGGTGCATGTGGAG
GACAGCAACGTGCTGGTGGTGAGTGGGGAGCGGCGGAGGGAAAAGGAAGAAGGGGTGAAG
TATGTGAGGATGGAGAGGAGGGTAGGGAAGCTGCTGAAAAAGTTCATTTTGCCGGAAAAT
GCAAACATGGATGCTATATCTGCTGTGAATCACGACGGTGTGTTGAAGGTTATGGTAGAG
AAGCTGCCACCGCCGGAGCCGAAGAAACCCAAGACCATCGAGGTGAAGGTGGGGTCGCCC
TCGGAGGAAGCTGCACCGGCGAGTGATGGAACGGGTACAAGTGGACAGCTGTACAAATGA
>LsHsp20-16
ATGGAGTTTTCAACATTTCCCCCTTCTTGGCACTCCTTTTTCACCTCCCCTCTCCTCTTT
CCATACCAATTCATCCCGGGAAACTACGTTCATTGGACCGAAACCCCGGAATCCCACATT
TACTCTGCGGATATCCCCGGGGTTAAGAAGGAGGAAATATGTGTGGAAGTTGAGGACTCA
AGGTACCTAATTATCCGTACAGAATCTGCTGACGATACGGTGATGACACCTGGCGGTCGT
ACTTTTATGAAAAAATTCAGGTTGCCAGATACAATTGATGTCAACGGGATTTCTGCTTGT
TATGAGAACGGGGTGTTAACGGTAACTGTTCCAAGATCTTTTGTCAGAAGGGGGTTTTAT
ATCGAACCAGCTGATCTGCCTCAACACACTGAAGTTCTTGCTAGAGCTGCTTGA
>LsHsp20-17
ATGGGTTTCGACACGCCGTTCTTCCGCAACCTCCACCACATCCTCGATGCCACCGAAGAC
ACCAACACCAACAGCAAATCAAGCAACGCCGGACCTACTCGCGCTTACTTACGTGACGCC
AGAGCAATGGCTGCAACTCCGGCGGATGTGAAGGAGTATCCCAGCTCTTACGTTTTCATC
GTCGACATGCCGGGTTTGAAGTCCGGAGATATCAAGGTTCAGGTGGAGGAAGACAACGTG
TTGGTGATAAGTGGAGAAAGGAAAAGGGAACACGATCAGGAAGAGAAGGAAGGAGCGAAG
TACGTGAGAATGGAGAGGAGGATCGGTAAGTTTATGAGGAAGTTTGCTTTGCCGGAAAAT
GCTAATACGGATAAGATATCTGCGATTTGTCAAGATGGGGTACTTACTGTCACAGTGGAG
AAACTGCCGCCGCCGGAGCCCAAGAAGCCGAAGACGATCCAGGTCAACGTTGCTTGA
22>LsHsp20-18
ATGATACCCTCCATTGAAACTGATGACGCCCTCCATCTATGGTTACATATGTTAAACATG
AATCAGAACCACCACCATCATCCAGAAATCGGTGTATTTTCGAATAGGATTTCGTCGATG
TCCGGTGGCTGCCTGGCTGGTGGTGTCGGATGGGTGTATGCTAATTCCATACCTGTCTGG
AGACTTCTAGATACACTCTTCTTACTTGCAGTCTCTCGAAAAACACAGATCCTTCTCTTC
CTGTTGGAAGACTCCAGAGATCCTTTTCCCATCGCCTATATAAACCCAACATTCCTGATT
CAACACAGAACTCGACAATCAAATAAAGGTTGTAGCATATCAAACATACTTCAATTCACT
ATCTGTTATTCGATTCAATCAACAAAGCCTACTTCTAGAAAGTTAAAACCACAAAAAATG
CCGATGTCGAAAATGCATACGACCACATTATTTGCTTTGACAGCATTAATGGCTTTGATT
ACGATAAGCTTACCTACACAAACGGAGGCTCTAATCCCCTACAACAGACCTCTTTGGGAC
ATGATGATCCCCGCCGAAGACCCATTCAAGATTCTGGAACATAACCCACTTCATCTTCCG
AAAAACCTTGAAACGATCAACCTGGCACGAGCCGACTGGAAGGAGACATCCGGACATCAC
GAGATATCCTTGGATGTACCAGGGTTGAAGAGGGAGGACATAAAGATCGAGGTGGAAGAG
AGCAGAGTCTTGAAGGTGAGCGGAGAGAGGAAGGCTGAGGAGGAAGTCGACGGTGATAAG
TGGCATAGGGCGGAAAGGACGAGTGGTAAGTTCTGGAGGCAGTTCCGGTTGCCGGGGAAT
GTGGACATGGAGAAGATAATGGCACATCTTGAAGACGGTGTGTTGAAGATCAAGGTGCCG
AAGTTGGCTCACGAGAAGAAACAATCTAGGGTTATTGATATCATGGGCCAGGAGAGCTCT
GGTGGGGACATTAAGGCAACAAAGACTGCTGCGTGA
>LsHsp20-19
ATGTCGATCATTCCAAGTTTCTTTACAGGCAGAAGGAGCAACGTATTCGATCCCTTCTCC
CTCGACATTTGGGATCCTTTCCAGGGCTTTTCAAGTGTCCTCAACAACCTACCCGAATCA
TCACGCGAAACAGCAGCAATCACCAACGCCAGAATCGATTGGAAGGAGACGCCGGAGGCG
CACGTTTTCAAGGCGGACATACCTGGGCTGAAGAAAGAGGAGGTGAAGGTGGAGGTTGAA
GAAGGAAGGGTGTTGCAGATAAGCGGAGAGAGGAGCAAGGAACATGAGGAGAAGAACGAC
AGGTGGCACAGGGTAGAGAGAAGCTCCGGGAAGTTCTTGAGGAGATTCAGGCTGCCGGAA
AATACAAAAATGGAAGAGGTGAAAGCTACCATGGAGAACGGCGTGCTGACGGTGACCGTG
CCCAAGGCGGAAGAGAAGAAGCCAGAAGTGAAGTCCATCGACATTGGTGGAAAGAGAAAT
TGCTCAATGTTTTCCCTCTTCCCCACCAGAGGTTCTCATGAATCTGATTGTGATTTCCAA
GAGGTATCAGATTCAAATAACGGGGGTGATGGAGAGGGTGGGTGGAGGTGGCTGCGTCTG
ACATGGTGGCACGAACTGTGA
>LsHsp20-20
ATGTCGATCATTCCAAGTTTCTTTACAGGCAGAAGGAGCAACGTATTCGATCCCTTCTCC
CTCGACATTTGGGATCCTTTCCAGGGCTTTTCAAGTGTCCTCAACAACCTACCCGAATCA
TCACGCGAAACAGCAGCAATCACCAACGCCAGAATCGATTGGAAGGAGACGCCGGAGGCG
CACGTTTTCAAGGCGGACATACCTGGGCTGAAGAAAGAGGAGGTGAAGGTGGAGGTTGAA
GAAGGAAGGGTGTTGCAGATAAGCGGAGAGAGGAGCAAGGAACATGAGGAGAAGAACGAC
AGGTGGCACAGGGTAGAGAGAAGCTCCGGGAAGTTCTTGAGGAGATTCAGGCTGCCGGAA
AATACAAAAATGGAAGAGGTGAAAGCTACCATGGAGAACGGCGTGCTGACGGTGACCGTG
CCCAAAGCGGAAGAGAAGAAGCCGGAGGTGAAGTCCATCGACATTGGTGGGTAA
>LsHsp20-21
ATGTCGATCATCCCAAGCTTTTTCGGTGGTCGTCGAACAAACGTCTTCGATCCCTTCTCC
CTCGACATCTGGGATCCTTTCGAAGGCTTCCCCTTCAACAACAACAACAACTTCCGTTCT
CTCTCCGATCGCGTCGGATCTTCTGAAACAGCTTCGTTCGCGCACGCGAATATTGACTGG
AGGGAGACTGCGGATGCTCACGTGTTCAAGGCGGATGTGCCGGGGCTGAAGAAGGAGGAA
GTGAAGGTTCAGGTTGAGGACGATCGAGTGCTGCAGATCAGTGGAGAGAGGAACAAAGAG
AGTGAGGAAAAGGGAGACACGTGGCACCGTGTTGAGAGAAGCAGCGGGAAGTTTATGCGA
AGGTTTAGGCTGCCGGAGAACGCGAAAGTGGATCAGGTGAAGGCGGCGATGGAGAATGGT
GTGCTGACTGTCACTGTGCCCAAAGTTGAAGTGAAAAAACCTGATGTGAAGTCGATTCAA
ATCTCTGGTTGA
>LsHsp20-22
ATGTCGATCATTCCAAGCTTCTTTACAGGCAGAAGGAGCAACGTATTCGATCCCTTCTCC
CTCGACATCTGGGACCCTTTCCAGGGCCTTTCCAGTGCTCTCAGCAACCTTCCCGAATCA
TCACGTGAAACAGCAGCAATCGCCAATACCAGAATCGACTGGAAGGAGACGCCGGAGGCC
CACATTTTCAAAGCGGACTTGCCTGGGCTGAAGAAAGAGGAGGTGAAGGTGGAGGTTGAA
GAAGGAAGGGTGTTGCAGATCAGCGGAGAGAGGAGCAGGGAACATGAAGAGAAGAACGAC
AAGTGGCATAGGGTTGAGAGGAGCTCCGGGAAGTTCTTGAGGAGGTTCAGGCTGCCGGAA
AGTGCAAAACTGGAAGAGGTGAAAGCTAGCATGGAGAACGGCGTGCTGACAGTGACCGTG
CCCAAGGCGGAAGAGAAGAAGCCGGAAGTGAAATCCATTGACATTAGTGGTTAA
>LsHsp20-23
ATGAAACTCGGGGGTGGTGGAACTAACAATCTAAACCGGCCAAGACGAGTGATCACCGGG
CGCGTTTATGAAAAGTTCAAGCCTATCTTTGAATGGAAACAAGAAGATGATCATGATAAT
CTTCTCGTTTATCTTCTTGGATTCCGAAAGGAGTTTATAAAGGTTACAATTGAAAATCCA
AACATCCTTAGAATTCGTGGGGAGTGTCTTGTATCTGGAAACAAATGGAATCGTTTTCAG
GAATATTTTACAGTTCCTGAAACATGCGAAAAGAGCAAAATCTGCGCCAAATTCGATGGC
GGAATCCTCAGCATTACCATGCCTAAGAAGATGACCGATGCACCCACCATCACTTTCCCA
CATCAACCATCGTTTGTAACTAGTGACAATACAAATCCAAACAATCAAGGAAAAATTGAA
CATAAGCAATCAAACCAAATCAAAGAAAATGAACCATCAATTGAGAAGATCATAAAGACA
AAGACAAGTATGGATTCAAAGGATAAATTAGAGAGGTGTAAGATGATAGTGAAAATGTTA
GCCATAGGAGGGATGAATGATGGGAGAATGGTGGTAGTGAACATGGTGGCAATGGTATTG
TTAGTAGCGCTATCTTGGGGTTTATGTTCCGTACTTCATTGGAACCTCAGATGA
>LsHsp20-24
ATGGAAGCCAAGGGAATAACTACACCTGCAGCTCGAGTTTATCAAGATTTCGAACCTTCA
ATGGAGTGGGTGCCCGAAGATGATTCCGATACTCTTCTCGTATATCTCCCTGGTTTTGCT
AAGGAACAATTGAGGGTTCAACTCCGATCAAGGAATTTGATCATTAGCGGTGAACGAAAG
CTCCAGCAAGACACATGGAGCCGATTTCGTGTAGAGTTTCCAGTTTCTGCAAACTGCGAT
CTCAACAAAATCAGTGCAAAATTCGAAGGAAACATTCTGTTCGTTAGGCAACCCAAATTG
ATCACTCCAGAACCAAAACCAGTTGAAGAAACCCCGCCGGTAGTTGCAGCGGCGCCGTTG
CCGACGCCTCAAAAGCCTGTTGCTGTACCAAATGTGGGTCAGAAAATTACCGACGAAAAA
CCCACCCCAGCAACACAAACAAATACGGAGAACAGTTTGAGGAAAGATCAAGAGGTTCCT
AAGATGGGAGTAGAGGAATCGAGCAAAAAACCCGATGAGAAATCTTCTGAACCAAAGAAA
GCGAAAGGTGTTCGTGAGAATGCCTCGGAGAAGAAACCAAGTGATTCAGACAGGAAGAAG
AAGACGAAGGTGGCGTTGGGTGAACTCGATAAAACGACTAAAACTGCAATAGAAAACTAT
AAACGGGCTGTTGGTGTGTTTGCTACGAAGCTAAAAACGTCAAGGAATGCTGTGAATACG
ATTGTGATTCTACTTGTTGGTCTTGTGATTGGTGTCTATGTCTCGGGTTCAATCAAATCT
TGGACAAAACCTTGA
>LsHsp20-25
ATGTCGATCATTCCAAGTTTCTTTACAGGCAGAAGGAGCAGCGTATTCGATCCCTTCTCC
CTCGACATCTGGGACCCTTTCCAGGGCTTTTCAAGTGTCCTCAACAACCTACCCGAATCA
TCACGCGAAACAGCAGCAATCACCAACGCCAGAATCGATTGGAAGGAGACGCCGGAGGCG
CACGTTTTCAAGGCGGACTTGCCTGGGCTGAAGAAAGAGGAGGTGAAGGTGGAGGTTGAA
GAAGGAAGGGTGTTGCAGATAAGCGGAGAGAGGAGCAAGGAACTTGAGGAGAAGAACGAC
AGGTGGCACAGGGTAGAGAGAAGCTCCGGGAAGTTCTTGAGGAGATTCAGGCTGCCGGAA
AATGCAAAAATGGAAGAGGTGAAAGCTAGCATGGAGAACGGCGTGCTGACGGTGACTGTG
CCCAAGGCAGAAGAGAAGAAGCCGGAAGTGAAGTCCATCGACATTGGTGGCTCCATGTTA
TCTACAAGCAACGATGAAAATTGTCTAGTAGGAGAATCTCAACCAATCGATGATACCAAT
GATATTATGGATGACTTCACTGTGGAAGATGCTTTTGCTACTATTGAAGACATGATATTG
GAAAAGCTACAAAAGAAGAAGACAAAAGCATAA
>LsHsp20-26
ATGGACTCAAAAGGAAGAACTACACCAACCCATGTATATCAACAATTGGAACCCTCAATC
GAGTGGGTAAATGAGGACGATTGCAACACTCTTCTTGTTTATCTCCCCGGTTTCACAAAG
GAACAACTGAGGGTTCAATTAAGATCAAAGACGTTGATCATCAGCGGTGAACGTAAACTC
CATGACAACGCATGGATTCGATTCCGGAAAGAATTTATTGCTTCAGAACAATGTGTTATC
AGCAAAATAAGTGCGAAATTTGAAGGCAGCATATTGTTTGTTAAGCAGCCAAAATCCGTC
GCCCCAATGGCGGAAGAAGAAGGAAAACCCCCCATCGAAGCTCCTGCTCCAAAACCAGAG
AAACCAATTGACGAAACAAAAAAGCATCAGAAAAGAACCCGAGTTGAACACGATACCAAA
CCCACTTCCACGACAGAGTCAAATGACAGAAATGGTGTTGGTCAGAACGCGAAAAAAGAT
TCTGAGAAGAACGTAGAGTTGAAGGAACAGAAAGGTGTTTGTGAAAATGCGTCAGAGAAG
AAGGTGAGTGATTTGGGTTTTGTGATGAAGATGAAACCATCGAAGAATGTAGTGAATTTG
ATTTTGGTGCTTGTGGTGGGATTATTGGTGGGTGTTTATTGCTCCGAAGCAATCAAGTCT
TGCAACGCTTGA
>LsHsp20-27
ATGGCTGCTCCAAACGGATCTCACGCAACTTGGACAAATCAAGTTCCGATAGCTGTAGCA
CCACTCAACTGTGTCCCATACACGGGCCCACCTCTTGACAACTCAGACGTTGACATGGCA
CAAAAAGAATCCAACCAAGTTTCAAAGAATCAGCCAGCCATGGTGTTTCTGCCGCCACAA
ACCACCGAGAAAGAACTGAACGATATTCTGGAGACCACCACACACGGGGTGGTGGTGTCG
GGTGGTGCCGCCAGCGGGAAATTTGGACCGCTTATCGGTTCCGTTGATATCTCCGAATCT
CATGACACTTTTCTATTTCGTGTTGCTCTTCCAGGTGTCAAGAATGATCAAAAGTTTAAA
TGTGACATTCAAGAAGATGGAAGCATTACAATTGAAGGGGCAACAGAAACAGGGGAGAAA
AAAGTTCATGTCCACAACATGGTGTTTGAGATGCACACACAAAACCTTTGTCCACCTGGC
AACTTCTCGGTTTCCTTCCAGTTGGGTGGGCCCGTTGACCCTTTGACTTTAGAGAAGGAG
TTGGCTAATGGTGTTCTTGAGGGTGTTGTTAAGAAAAAACCACTCAAGGGTTTGTGA
>LsHsp20-28
ATGGCGTTACTTGGCGATCCATTCAGACGATTCTTCTTCAACCCTCCAATCTATCGCACT
GGATCAGTAACAACAGGTCTCATGGATTGGTTCGAAACTCCACAAGCTCACTTCATCAAA
ATCAACGTCCCAGGATATAGCAAGGAGGACGTGAAGGTGCAGGTGGAAGAAGGGAATGTG
TTGGTGGTGAGAGGCGAAGGTGGAAAAGAAAAGGAAAAGGAAAAGGGGACTGTTTGGCAT
GTGGCTGAGAGAGGAGGAGGAGTCGAGGGTGTTGGGTTTTCGAGGGAAATCGAGTTGCCG
GAGGATGTGAAAGTTGATCAGATCAAAGCTCAGGTGGAAAATGGGGTTTTGACGGTGGTT
TTGCCGAAAGATCTCAGCCCCAAGGCCTCCAAAGTTCGTAACATTCATGTCTCCAGCAAG
CTTTAG
>LsHsp20-29
ATGGATTCAAAGGTTGGAGGCACCCAATTGCAAAAGTTATTATCTTATGATGAATTCGAA
CCCATGTGCACATGGCAACGTGAGGATGGACAAGATGTACTCGTGCTCCATCTCCCAGAA
TTCAAGAAGGATCAACTAAGAATCCAGATTAGCAATACTGGGATTTTGAAGATCACTGGA
GAAAATGTTGTAGATGGTAAAAGGAGAAACCGTTTTTTGAAAGAAATTAAGGTCACAAAA
GATTATGACTCAAACAACATTCATGCCAAATTCTCCCAAGGTCGTCTTCGTGTTACTATG
CCCAAAAAAGTTCCAACACCCACAACCATGGAATCGCCTTCTGCAGCTGCGATGGCATTG
CCTCAAGATAACCAAAACGATACTATTGCCAACACAAACGGGAAAACGTCCATCATTCCT
AATATAAGAGCAAGAGTAGGCAAAGTTGTGAAATCTAAAGAGTTTTCTGCAGCAATGGTG
AATGTTGGCTTTGTAGTGGTCGCGGCTTTTAGCATTTATGTTGCATATAATTACTGGACT
TCATATGTACGAGTTGATGAGGATTGA
>LsHsp20-30
ATGGACATCAGTCTAATGGGTTTTGATTCGCCGCTTTTGCACAACCTCCACCATATCCTT
GCAGCCACCGACGACACCACCACCAACAATAAATCGAGCAATATCGGACCTACTCGCGCT
TATGTCCGTGACGCCAGAGCAATGGCTGCAACTCCGGCTGATGTGAAGGAGTATCCCAAC
TCTTACGTCTTCGTCGTTGACATGCCTGGTCTGAAGTCCGGAGATATCAAGGTCCAGGTG
GAGGAAGACAACGTGTTGGTGATAAGTGGAGAGAGAAAAAGGGAACACGATCAGGAAGAG
AAGGAAGGAGTGAAATACGTGAGGATGGAGAGGAGGATCGGGAAGTTTATGAGGAAGTTT
GCGTTGCCGGAAAATGCCAATTTGGAGAAGATATCTGCGATTTGTCAAGATGGAGTGCTT
ACAGTGACGGTGGAGAAACTGCCGCCGCCGGAGCCCAAGAAGCCGAAGACGATTCAGGTC
CAGGTTGCTTGA
>LsHsp20-31
ATGGCTACCACCCTAATTCTCAAGCGAAGCACCGCCGCATCTTCTCACTATACCAAGATC
TTTAAATCTATTCGCTCCGTCTCCGCTATTCCCTGCGTCCAACGCTCCTTTAACACTAAT
GCTTCTCAGGTGTCCGCTTATGAAGATTTCCACCGCAGTATCGATGAGGATCGCTCGTCT
GGTTCCTCTGGTTTTCGCCGCCGTGACAATGATTTTTTCTCAGGCGAGTTCCATGTTTCA
ATTTTTCCAGCGAGAAGCTTCAGCGAGATCTTTAACATGATGGACCAATTCATGGACACT
CCATTCATCTCCGCCTCTCGCGGAGGAGGATTAGGAGGAAGGCGAGGATGGTATGCAAAG
GAAGACGACAACACTATGAATCTCCGATTCGACATGCCAGGTCTGGACAAGGAGAACGTC
AAGGTCTCCGTTGAGCAAAACACATTAATTATCAAAGCGGAGGAGGAGAAAGATTCTGAG
GATGATGAAGAGGCGCGGCGGAGGTACTCTTCCAGGATTGATCTGCCGACGGATGTGTAC
ATTCTGGATGAAATCAAGGCGGAGATGAAGAATGGTGTGTTGAAAGTTGTGCTTCCGAAG
GTGAAAACGGAGGAAAGGAAGGATGTGTTTCAGGTCCAAGTAGAGTGA
>LsHsp20-32
ATGGCTTGCACAACAAGCGGGATCTCTTCTTCCCCTCTTCTCTCAAACAACATCTCCAAG
CCTTCAACCAAATCGATCAGACCTACTTGCTGTGCCTTACGTTTCTTTCCGCCTTCACGA
ACCCGCAGCAGACTCCCCGTCGTCAGAGCTCAGGCAGAAAAAGATACCTCCGTCGATGTT
CAAGTCAGTAGCAACCAAGGCAAAGCTTCTGCTAATGGATCCGTAGAACGCCGCCCCTCA
TCCACCACCATATCCCCTTTTGGGTTGTTGGATCCATTATCTCCGATGAGAACAATGCGT
CAAATGCTGGACACGATGGACAGGATATTTGAAGACTCGATGGCGTTCCCAACGAGGACT
GGTACGGCCTGGAACATTCGTTCTCCATGGGACATACAGGACTCTGAGAATGAAATCAAG
ATGAGATTTGACGTGCCTGGACTCTCCAAGGAAGATCTGAAGGTGTATGTGGAGGATGAC
ATGCTTGTTATCAAGGGAGAACATACGCAGGATGATCAGAATGAAGGAGGCGACAAGAGT
TCCTGGACTAGACAGAATTACAGCTCCTATCAAACTCGCATTGATCTGCCGGATAATTGT
GAGAAAGAGAAGATCAAAGCTGATTTGAAAAATGGTGTTCTCTTGATCTCCATTCCGAAG
AAGACGGTTGAGCGAAAGGTGATTGATGTGGAAATCCAGTGA
>LsHsp20-33
ATGTCGATCGTTCCCAGCTTCTTCGGTGGCAGACGAAGCAGCATCTTCGACCCATTCTCT
CTTGATATCTGGGACCCCTTTAAAGACTTTCCCTTTCCAACTCCATCCGATGCGTCGACG
GAAACCTCTGCTTTGGTGAACGCCCGTGTGGACTGGAAAGAAACACCGGAGGCGCACGTG
TTTAAGGCCGATCTCCCTGGGATCAAGAAAGAGGAAGTGAAGGTGGAAGTTGAAGGCGAC
AGGATTTTGCAGATCAGCGGTGAGAGGAATGTTGAGAAAGAAGATAAGAATGATACATGG
CACAGGGTGGAACGCAGTAGCGGGAAGTTCACAAGGAGGTTTAGGTTGCCGGAGAATTCG
AAGATGGATCAAGTGAAGGCTTCAATGGAGAACGGAGTGCTTACAATTACTATTCCAAAG
GAGGAGGTTAAGAAGCCTGATGTTAAGCCTATTCAAATCTCTGGTTAG
>LsHsp20-34
ATGTCGATCATTCCCAGCTTCTTTGGTGGCAGACGAAGCAGCGTCTTCGACCCATTCTCT
CTTGATATCTGGGACCCCTTTAAAGACTTCCCCTTTCCAACTTCATCCGATGCTTCGAGG
GAAACCTCTGCTTTGGTGAACGCTCGTGTGGACTGGAAAGAAACCCCGGAGGCGCACGTG
TTCAAGGCCGATCTCCCTGGGATCAAGAAAGAGGAAGTGAAGGTGGAAGTTGAAGACGAC
AGGATTTTGCAGATCAGCGGTGAGAGGAGTGTTGAGAAAGAAGATAAGAATGATACATGG
CACAGGGTGGAACGCAGTAGCGGGAAGTTCACAAGGAGGTTTAGGTTGCCGGAGAATTCG
AAGATGGATCAAGTGAAGGCTTCAATGGAGAACGGAGTGCTTACAATTACTATACCAAAA
GAGGAGGTGAAGAAGCCTGATGTTAAGCCTATTCAAATCTCTGGTTAG
>LsHsp20-35
ATGCAATTCTCAACATTTCAACCTTCTTTGCAATCTTTCTTCACCTCCCCTCTCCTCTTC
CCATACCCATTCATCCCTGAAAACTACGTTCGATGGGATCGTTGGGACGAAACCCCGGAA
TCCCACATCTACTCCGCCGATATCCCTGGTGTAAGAAAAGAAGATATACGTGTGGAAATC
GAGGACTCAAAGTACCTCATCATTCGAACGGAGTCAGCAGATGATATGATGATAATGGCC
GGACGTCGGAGTTTCTTGAAGAAATTCAGGCTCCCGGAAACAATCGACGTGAATGGGATT
TCTGCTGGCTATGAGAATGGGGTGTTGACGATTACTGTTCCGAGATCATTTGTTCGGAGA
GAATTTTATATTGAACCTGGTGATCTCCATGAACAGGTGGAAGTTCTTGCGAGGGCTGCG
TAA
>LsHsp20-36
ATGGATTCCAGTTCCAAACTGGGTTTACACCCCAAAGATGAAACAGATCCCGTCTTCATC
ACTCAACAGACAGACTCCATGTTCATCCTCAAATCCCACCTTAAAGGGTATGATAGAAGC
AACATAAAGATCGAGATAAACGAGGATGGGAGTAGAATCACAATAAGTGGTAAAAATCCC
GTTTGCCAAGAGGAAACAATAAAGGGATTCCAGAAAACCTTCAGAATCCCCGAGGGAGTG
GTTTTGGATAAAGTCAAAGCCAGGTTTGACCAAGATGAATCAAGACTCATCATTCGAATG
CCAAAATCAGTACATGGGATCGTGGGAATCGGGATTCAAGAATTAGAAAATCCAATCCAA
GAAAACGAAAATCATGAAATGAAAAATGAAGAAACTGTGGGATCGAATGATTTGACACAA
GAGGAAGAAGTAAAACCTCGTGAAAAGAGCTCGATTATATGTACTCCAGTCATAGCTGGG
TCAACGTTGTTTGTAACAATTATTGTGGTTGTTTTGAGTTTGTTTCGATCTAAAACCGGA
TCAAGGGAAAAAAAGAATTAA
>Actin
ATGGCCGACACTGAGGATATTCAGCCCCTTGTTTGTGACAATGGAACTGGAATGGTGAAG
GCTGGGTTTGCTGGTGATGATGCTCCAAGGGCAGTGTTTCCTAGTATTGTTGGTAGACCA
CGTCACACTGGTGTGATGGTAGGTATGGGCCAGAAAGATGCTTATGTTGGAGATGAGGCA
CAATCCAAAAGAGGTATTCTTACCTTAAAATATCCAATTGAACATGGAATTGTGAGCAAC
TGGGATGACATGGAAAAGATTTGGCATCACACTTTCTACAACGAGCTCCGTGTTGCTCCT
GAAGAGCACCCTGTTCTTCTCACTGAGGCACCTCTCAACCCCAAGGCCAATAGAGAGAAG
ATGACTCAAATCATGTTTGAGACATTCAATGTTCCTGCCATGTATGTTGCTATCCAGGCT
GTGCTTTCCCTCTATGCCAGTGGTCGTACAACCGGTATCGTGTTGGATTCTGGTGATGGT
GTCTCCCACACAGTCCCAATCTACGAAGGGTACGCCCTCCCTCATGCCATCCTCCGTCTT
GACCTGGCGGGGCGTGACCTCACAGACTCCCTGATGAAAATCCTAACGGAACGAGGTTAC
ATGTTCACCACCACAGCAGAACGTGAAATCGTGCGTGACATGAAGGAGAAGCTCGCCTAC
GTGGCGCTTGACTTTGAACAAGAACTGGAAACCGCCAAGTCCAGCTCATCCGTGGAAAAG
AACTACGAGTTGCCGGACGGACAGGTCATCACGATCGGAGCTGAGAGATTCCGGTGCCCG
GAGGTGCTTTTCCAGCCGTCGTTGATCGGAATGGAAGCAGCCGGAATCCACGAGACGACT
TATAATTCGATCATGAAGTGTGATGTGGATATCAGGAAGGATCTTTATGGGAATATTGTG
CTTAGTGGTGGGTCCACTATGTTTCCTGGAATTGCTGATAGGATGAGTAAGGAGATTACT
GCTTTGGCTCCCAGTAGCATGAAGATTAAGGTGGTTGCTCCACCTGAGAGAAAGTACAGT
GTCTGGATCGGAGGCTCCATCCTTGCTTCACTCAGTACCTTCCAACAGATGTGGATCTCA
AAGGGTGAATATGATGAGTCTGGTCCATCCATTGTCCACAGGAAGTGCTTCTAA
