# Supplementary material for: Genome-wide profile analysis of the Hsp20 family in lettuce and identification of its response to drought stress
Source: Front Plant Sci. 2024 Jul 12;15:1426719. doi: 10.3389/fpls.2024.1426719 (PMC11272627; doi:10.3389/fpls.2024.1426719)
Supplement: Supplementary file 3 [file Table_3.xlsx]

## Sheet: Sheet2
Supplementary table S3. Primers used for qRT-PCR
Gene name	Gene ID	F/R(Primer)	Sequence (5'-3')
LsHsp20-1	LSAT_5X168220	Foword	GCAGCATCTTCGATCCATTC
		Rverse	GTTTCCTTCCAATCCACACG
LsHsp20-4	LSAT_8X151001	Foword	CACAACCCACAGATCAAACC
		Rverse	TCTTCTTGATGGGTTGCTGA
LsHsp20-5	LSAT_5X171121	Foword	ACGGTTTATTGACCTCCTCC
		Rverse	TCCTACCTTCTTCCACCTCA
LsHsp20-6	LSAT_4X107421	Foword	GTGGTTAGTGGAGAAAGGCA
		Rverse	TGCTGATACTGGTTCTGGTT
LsHsp20-7	LSAT_6X100581	Foword	ATCCCACAAGGGGTTGTTTT
		Rverse	CTTGCTCTGACAACTCTCCA
LsHsp20-8	LSAT_7X61061	Foword	AACCTCCACCACATCCTTAC
		Rverse	TATCTCCGGACTTCAGACCA
LsHsp20-9	LSAT_7X61001	Foword	GCCACCTCCATCACATCC
		Rverse	AGTTGCAGCCATTGCTCT
LsHsp20-10	LSAT_3X481	Foword	TGACTGCCTATGACGATGAC
		Rverse	ATAAGCGGATTCCCCATGAA
LsHsp20-11	LSAT_5X136741	Foword	CAGGGTTGCGATTTCTTCTC
		Rverse	CTCCAGTATATCCACCGCAA
LsHsp20-12	LSAT_7X60201	Foword	AACCTCCACCACATTCTTGA
		Rverse	ATCTTCGGACTTCAGACCAG
LsHsp20-13	LSAT_7X108120	Foword	GTGTGGATTGGCTTCAAACA
		Rverse	TTCCACACCCCACTAATCTC
LsHsp20-14	LSAT_9X81920	Foword	GATCCCAACCGAAGACCC
		Rverse	GTCCTTTCCGCCCTATGC
LsHsp20-15	LSAT_7X60240	Foword	AAGGGGTGAAGTATGTGAGG
		Rverse	CGATGGTCTTGGGTTTCTTC
LsHsp20-16	LSAT_7X17661	Foword	CCCTCTCCTCTTTCCATACC
		Rverse	ACCGTATCGTCAGCAGATTC
LsHsp20-17	LSAT_7X61041	Foword	TCCCAGCTCTTACGTTTTCA
		Rverse	TCCTGATCGTGTTCCCTTTT
LsHsp20-19	LSAT_2X28080	Foword	TCCATCGACATTGGTGGAAA
		Rverse	CTCCATCACCCCCGTTATTT
LsHsp20-20	LSAT_2X28120	Foword	AACCTACCCGAATCATCACG
		Rverse	CTTCCTTCTTCAACCTCCAC
LsHsp20-21	LSAT_2X120081	Foword	GAAGCAGCGGGAAGTTTATG
		Rverse	TCAGCACACCATTCTCCATC
LsHsp20-22	LSAT_2X120060	Foword	AGGTTGAAGAAGGAAGGGTG
		Rverse	TTCCAGTTTTGCACTTTCCG
LsHsp20-23	LSAT_1X25141	Foword	TGCTTTGAGTGGAAGTGCTA
		Rverse	TAGGAGTCTTCACATTCGCC
LsHsp20-24	LSAT_7X14200	Foword	CCAAAGAAAGCGAAAGGTGT
		Rverse	TTCGTAGCAAACACACCAAC
LsHsp20-26	LSAT_4X63061	Foword	GTTAAGCAGCCAAAATCCGT
		Rverse	TCGGGTTCTTTTCTGATGCT
LsHsp20-27	LSAT_2X7120	Foword	ACGTTGACATGGCACAAAAA
		Rverse	TCGTTCAGTTCTTTCTCGGT
LsHsp20-28	LSAT_3X65081	Foword	AACCCTCCAATCTATCGCAC
		Rverse	TGCTATATCCTGGGACGTTG
LsHsp20-29	LSAT_1X56241	Foword	AAGGTCGTCTTCGTGTTACT
		Rverse	GACGTTTTCCCGTTTGTGTT
LsHsp20-30	LSAT_7X61081	Foword	GCAATATCGGACCTACTCG
		Rverse	AGACCAGGCATGTCAACG
LsHsp20-33	LSAT_8X72460	Foword	ACGTGTTTAAGGCCGATCTC
		Rverse	GATCTGCAAAATCCTGTCGC
LsHsp20-34	LSAT_8X72420	Foword	TCGTGTGGACTGGAAAGAAA
		Rverse	ACCCTGTGCCATGTATCATT
LsHsp20-36	LSAT_9X40940	Foword	TCCCGTCTTCATCACTCAAC
		Rverse	TGGCAAACGGGATTTTTACC
Actin	LSAT_8X116260	Foword	GGCAACTGGGATGACATGGAAA
		Rverse	GCACAGCCTGGATAGCAACATA
