# Supplementary material for: Genome-wide profile analysis of the Hsp20 family in lettuce and identification of its response to drought stress
Source: Front Plant Sci. 2024 Jul 12;15:1426719. doi: 10.3389/fpls.2024.1426719 (PMC11272627; doi:10.3389/fpls.2024.1426719)
Supplement: Supplementary file 4 [file Table_4.xlsx]

## Sheet: Sheet1
Supplementary table S4. Prediction of the conserved structure of the LsHsp20 gene family in lettuce
Name	Number of amino acids	Sequence
Motif 1	33	FRLPENAKMEKIKASMEBGVLTVTVPKLEVKKP
Motif 2	24	TPEAHVFKADLPGLKKEEVKVZVE
Motif 3	21	SKEEEEKGDKWHRVERSSGKF
Motif 4	30	MSIIPSFFGGRRSSVFDPFSLDIWDPFQGF
Motif 5	50	MGFDTPFFRNLHHILDATDDTTTNNKSSNAGPTRAYVRDARAMAATPADV
Motif 6	11	EDRVLQISGER
Motif 7	21	NPPESSRETAAITNARIDWKE
Motif 8	50	MPMSKMHKITLFALTALIALITISLPTKTEALIPYNRPLWDMMIPAEDPF
Motif 9	8	VKSIDISG
Motif 10	29	STFPPSWQSFFTSPLLFPYPFIPENYVRW
Motif 11	38	WDPFSPARSLSQIFDTMDRFMEDPLAYPSRGGGAAGRR
Motif 12	40	TETGEKKVCRFDQIFEMQTQKLCPPGNFSVSFKLGGPVDP
Motif 13	12	RVYZQFEPMIEW
Motif 14	50	RSVSAIPCVQRCFNTNASQMSAYEDDNRGIDEDRRAGSSGFRRRDNDFFS
Motif 15	48	RRYSSRIDLPLDVYKLDEIKAELKNGVLKIRLPKVKEEERKDVRQIQV
