# Supplementary material for: Genome-wide profile analysis of the Hsp20 family in lettuce and identification of its response to drought stress
Source: Front Plant Sci. 2024 Jul 12;15:1426719. doi: 10.3389/fpls.2024.1426719 (PMC11272627; doi:10.3389/fpls.2024.1426719)
Supplement: Supplementary file 5 [file Table_5.xlsx]

## Sheet: Sheet1
Supplementary Table S5. Secondary structure of the LsHsp20 protein
Gene	Alpha helix/%	Extended strand/%	Random coil/%	Beta turn/%
LsHsp20-1	21.79	18.59	55.13	4.49
LsHsp20-2	37.25	18.14	35.29	9.31
LsHsp20-3	34.12	15.64	42.65	7.58
LsHsp20-4	22.13	15.32	59.15	3.4
LsHsp20-5	24.03	19.48	50.65	5.84
LsHsp20-6	30.08	15.68	46.19	8.05
LsHsp20-7	33.88	17.36	42.98	5.79
LsHsp20-8	34.76	20.12	39.63	5.49
LsHsp20-9	38.65	19.02	34.97	7.36
LsHsp20-10	25.12	15.35	54.88	4.65
LsHsp20-11	26.71	23.6	43.48	6.21
LsHsp20-12	34.36	19.63	39.26	6.75
LsHsp20-13	23.04	19.9	51.31	5.76
LsHsp20-14	34.38	18.75	42.19	4.69
LsHsp20-15	27.93	20.11	46.93	5.03
LsHsp20-16	20.44	22.63	51.82	5.11
LsHsp20-17	34.81	18.35	40.51	6.33
LsHsp20-18	30.21	20.54	42.6	6.65
LsHsp20-19	10.68	23.3	60.19	5.83
LsHsp20-20	27.39	17.2	49.68	5.73
LsHsp20-21	21.47	17.18	55.21	6.13
LsHsp20-22	21.66	19.75	52.23	6.37
LsHsp20-23	18.43	14.75	58.53	8.29
LsHsp20-24	25.38	19.32	51.52	3.79
LsHsp20-25	29.52	15.71	47.14	7.62
LsHsp20-26	22.87	17.49	54.26	5.38
LsHsp20-27	14.65	25.76	51.52	8.08
LsHsp20-28	14.89	23.4	53.9	7.8
LsHsp20-29	28.72	15.43	50.53	5.32
LsHsp20-30	30.06	22.09	42.94	4.91
LsHsp20-31	26.98	13.95	53.95	5.12
LsHsp20-32	13.73	21.03	60.52	4.72
LsHsp20-33	18.71	20.65	54.84	5.81
LsHsp20-34	26.45	19.35	48.39	5.81
LsHsp20-35	28.57	17.86	46.43	7.14
LsHsp20-36	25.81	24.19	43.01	6.99
	10.68	13.95	34.97	3.4
	38.65	25.76	60.52	9.31
