# Supplementary material for: Genome-wide profile analysis of the Hsp20 family in lettuce and identification of its response to drought stress
Source: Front Plant Sci. 2024 Jul 12;15:1426719. doi: 10.3389/fpls.2024.1426719 (PMC11272627; doi:10.3389/fpls.2024.1426719)
Supplement: Supplementary file 6 [file Table_6.xlsx]

## Sheet: Sheet1
Supplementary Table S6. Information of Hsp20 genes from lettuce, Arabidopsis,rice,tomato and barley
Lettuce		Arabidopsis		Rice		Tomato		Barley
Gene name	Gene ID	Gene name	Gene ID	Gene name	Gene ID	Gene name	Gene ID	Gene name	Gene ID
LsHsp20-1	LSAT_5X168220	AtHsp20-1	AT1G07400	OsHsp20-1	LOC_Os02g10710.1	SoHsp20-1	Solyc00g053740	HvHsp20-1	HORVU0Hr1G020420
LsHsp20-4	LSAT_8X151001	AtHsp20-2	AT1G52560	OsHsp20-2	LOC_Os01g04380.1	SoHsp20-2	Solyc01g009200	HvHsp20-2	HORVU7Hr1G036500
LsHsp20-5	LSAT_5X171121	AtHsp20-3	AT1G54400	OsHsp20-3	LOC_Os03g15960.1	SoHsp20-3	Solyc01g009220	HvHsp20-3	HORVU7Hr1G036570
LsHsp20-6	LSAT_4X107421	AtHsp20-4	AT1G54840	OsHsp20-4	LOC_Os02g03570.1	SoHsp20-4	Solyc01g017030	HvHsp20-4	HORVU2Hr1G046370
LsHsp20-7	LSAT_6X100581	AtHsp20-5	AT1G54850	OsHsp20-5	LOC_Os05g51440.1	SoHsp20-5	Solyc01g017790	HvHsp20-5	HORVU1Hr1G094510
LsHsp20-8	LSAT_7X61061	AtHsp20-6	AT1G59860	OsHsp20-6	LOC_Os02g52150.1	SoHsp20-6	Solyc01g018070	HvHsp20-6	HORVU5Hr1G061160
LsHsp20-9	LSAT_7X61001	AtHsp20-7	AT1G76440	OsHsp20-7	LOC_Os01g04350.1	SoHsp20-7	Solyc01g096960	HvHsp20-7	HORVU5Hr1G061170
LsHsp20-10	LSAT_3X481	AtHsp20-8	AT1G76770	OsHsp20-8	LOC_Os01g08860.1	SoHsp20-8	Solyc01g096980	HvHsp20-8	HORVU5Hr1G006670
LsHsp20-11	LSAT_5X136741	AtHsp20-9	AT2G03020	OsHsp20-9	LOC_Os01g04340.1	SoHsp20-9	Solyc01g102960	HvHsp20-9	HORVU6Hr1G015130
LsHsp20-12	LSAT_7X60201	AtHsp20-10	AT2G19310	OsHsp20-10	LOC_Os11g13980.1	SoHsp20-10	Solyc02g080410	HvHsp20-10	HORVU4Hr1G015170
LsHsp20-13	LSAT_7X108120	AtHsp20-11	AT2G27140	OsHsp20-11	LOC_Os10g07210.1	SoHsp20-11	Solyc02g093600	HvHsp20-11	HORVU6Hr1G070230
LsHsp20-14	LSAT_9X81920	AtHsp20-12	AT2G29500	OsHsp20-12	LOC_Os02g12610.1	SoHsp20-12	Solyc03g082420	HvHsp20-12	HORVU4Hr1G060760
LsHsp20-15	LSAT_7X60240	AtHsp20-13	AT4G16540	OsHsp20-13	LOC_Os10g07200.1	SoHsp20-13	Solyc03g113180	HvHsp20-13	HORVU6Hr1G082360
LsHsp20-16	LSAT_7X17661	AtHsp20-14	AT4G16550	OsHsp20-14	LOC_Os10g30180.1	SoHsp20-14	Solyc03g113930	HvHsp20-14	HORVU4Hr1G072700
LsHsp20-17	LSAT_7X61041	AtHsp20-15	AT4G16560	OsHsp20-15	LOC_Os01g04360.1	SoHsp20-15	Solyc03g123540	HvHsp20-15	HORVU4Hr1G072680
LsHsp20-19	LSAT_2X28080	AtHsp20-16	AT4G21870	OsHsp20-16	LOC_Os03g16040.1	SoHsp20-16	Solyc04g014480	HvHsp20-16	HORVU4Hr1G060720
LsHsp20-20	LSAT_2X28120	AtHsp20-17	AT4G27890	OsHsp20-17	LOC_Os06g11610.1	SoHsp20-17	Solyc04g071490	HvHsp20-17	HORVU6Hr1G077710
LsHsp20-21	LSAT_2X120081	AtHsp20-18	AT5G02480	OsHsp20-18	LOC_Os04g36750.1	SoHsp20-18	Solyc04g072250	HvHsp20-18	HORVU7Hr1G036470
LsHsp20-22	LSAT_2X120060	AtHsp20-19	AT5G20970	OsHsp20-19	LOC_Os02g54140.1	SoHsp20-19	Solyc05g014280	HvHsp20-19	HORVU7Hr1G036540
LsHsp20-23	LSAT_1X25141	AtHsp20-20	AT5G37670	OsHsp20-20	LOC_Os09g17660.1	SoHsp20-20	Solyc06g076520	HvHsp20-20	HORVU1Hr1G035950
LsHsp20-24	LSAT_7X14200	AtHsp20-21	AT5G47590	OsHsp20-21	LOC_Os07g33350.1	SoHsp20-21	Solyc06g076540	HvHsp20-21	HORVU1Hr1G094450
LsHsp20-26	LSAT_4X63061	AtHsp20-22	AT5G47600	OsHsp20-22	LOC_Os03g16020.1	SoHsp20-22	Solyc06g076560	HvHsp20-22	HORVU1Hr1G094440
LsHsp20-27	LSAT_2X7120	AtHsp20-23	AT5G51440	OsHsp20-23	LOC_Os03g16030.1	SoHsp20-23	Solyc06g076570	HvHsp20-23	HORVU3Hr1G020390
LsHsp20-28	LSAT_3X65081	AtHsp20-24	AT5G54660	OsHsp20-24	LOC_Os06g14240.1	SoHsp20-24	Solyc07g045610	HvHsp20-24	HORVU3Hr1G007500
LsHsp20-29	LSAT_1X56241	AtHsp20-25	AT4G16545	OsHsp20-25	LOC_Os03g45330.1	SoHsp20-25	Solyc07g055720	HvHsp20-25	HORVU3Hr1G020520
LsHsp20-30	LSAT_7X61081	AtHsp20-26	AT1G76780	OsHsp20-26	LOC_Os03g45340.1	SoHsp20-26	Solyc07g064020	HvHsp20-26	HORVU2Hr1G120170
LsHsp20-33	LSAT_8X72460	AtHsp20-27	AT4G16555	OsHsp20-27	LOC_Os03g14180.1	SoHsp20-27	Solyc08g062340	HvHsp20-27	HORVU3Hr1G020500
LsHsp20-34	LSAT_8X72420			OsHsp20-28	LOC_Os05g42120.1	SoHsp20-28	Solyc08g062450	HvHsp20-28	HORVU3Hr1G006530
LsHsp20-36	LSAT_9X40940			OsHsp20-29	LOC_Os03g61940.1	SoHsp20-29	Solyc08g078700	HvHsp20-29	HORVU3Hr1G006930
				OsHsp20-30	LOC_Os03g06170.1	SoHsp20-30	Solyc08g078710	HvHsp20-30	HORVU1Hr1G066530
				OsHsp20-31	LOC_Os02g48140.1	SoHsp20-31	Solyc08g078720	HvHsp20-31	HORVU4Hr1G002280
				OsHsp20-32	LOC_Os01g40530.1	SoHsp20-32	Solyc09g007140	HvHsp20-32	HORVU4Hr1G002290
				OsHsp20-33	LOC_Os01g04370.1	SoHsp20-33	Solyc09g011710	HvHsp20-33	HORVU4Hr1G072770
				OsHsp20-34	LOC_Os10g30162.1	SoHsp20-34	Solyc09g015000	HvHsp20-34	HORVU4Hr1G063350
				OsHsp20-35	LOC_Os01g40550.1	SoHsp20-35	Solyc09g015020	HvHsp20-35	HORVU3Hr1G051000
						SoHsp20-36	Solyc09g059210	HvHsp20-36	HORVU3Hr1G007380
						SoHsp20-37	Solyc10g076880	HvHsp20-37	HORVU3Hr1G006940
						SoHsp20-38	Solyc10g086680	HvHsp20-38	HORVU3Hr1G020490
						SoHsp20-39	Solyc11g020330
						SoHsp20-40	Solyc11g071560
						SoHsp20-41	Solyc12g042830
						SoHsp20-42	Solyc12g056560
