# Supplementary material for: Genome-wide profile analysis of the Hsp20 family in lettuce and identification of its response to drought stress
Source: Front Plant Sci. 2024 Jul 12;15:1426719. doi: 10.3389/fpls.2024.1426719 (PMC11272627; doi:10.3389/fpls.2024.1426719)
Supplement: Supplementary file 7 [file Table_7.xlsx]

## Sheet: Sheet1
Supplementary Table S7. Information on cis-elements of LsHsp20 gene promoters
	Stress-related					Hormone-related					Development-related
Gene	Heat stress	Defense and stress	Low-temperature	Anaerobic induction	Drought-inducibility	Abscisic acid	Auxin	Gibberellin	MeJA	Salicylic acid	Meristem	Circadian	MSA-like
	HSE	TC-rich	LTR	ARE	MBS	ABRE	Auxin	Gibberellin	MeJA	TCA-element	CAT-box	Circadian	MSA-like
LsHsp20-1		2		2				1	6
LsHsp20-2			1	6		2		5	2
LsHsp20-3			1		1				2
LsHsp20-4		1		3				1	2	2	1
LsHsp20-5			1	2	1	1	2	1		1
LsHsp20-6			4	3	3	1			4			1
LsHsp20-7		1		4	1		1	1	2
LsHsp20-8			1	2		2	1		6			1	2
LsHsp20-9						1	1	1	6
LsHsp20-10		1	1	3		8	1	1	4	1
LsHsp20-11				1		7	2	1	4		1
LsHsp20-12			2	1		5	1	2	6			1
LsHsp20-13		1		1	1	2	1	1	2		2		1
LsHsp20-14				2						2	1
LsHsp20-15			2	2		5	2		8
LsHsp20-16		2		4		2	1	2				1
LsHsp20-17				3					2
LsHsp20-18		2		3				1
LsHsp20-19				1		3	1	2		1
LsHsp20-20	1			2		2	1	1	4
LsHsp20-21			1	2		1		1		1
LsHsp20-22		1	5		1	3	1		6	1	1
LsHsp20-23				5		2
LsHsp20-24		2	1	2				1		1	1
LsHsp20-25	1		2	2		5	2	2	2	2
LsHsp20-26		1	1	1			1	1	2			1
LsHsp20-27		2	3	5	2	4	1
LsHsp20-28			1	3			2	1	2		2
LsHsp20-29			3	2	2	1	1		6	1		1
LsHsp20-30				3		5	3	1	4
LsHsp20-31			1	3	1	5		1	2		1
LsHsp20-32			1	6		1				1	1
LsHsp20-33			2			5	1		4	2
LsHsp20-34						5						1
LsHsp20-35			1	2		2	1		2	1
LsHsp20-36		1		2				1	2
